# Supplementary material for: Cd3P2/Zn3P2 Core-Shell Nanocrystals: Synthesis and Optical Properties
Source: MDPI journal article supplement (doi:10.3390/nano12193364), 2022-09-27

# **Cd<sub>3</sub>P<sub>2</sub>/Zn<sub>3</sub>P<sub>2</sub> Core-Shell Nanocrystals: Synthesis and Optical Properties**

**Benjamin F.P. McVey**<sup>1</sup>, **Robert A. Swain**<sup>1</sup>, **Delphine Lagarde**<sup>1</sup>, **Wilfried-Solo Ojo**<sup>1</sup>, **Kaltoum Bakkouche**<sup>1,2</sup>, **Cécile Marcelot**<sup>3</sup>, **Bénédicte Warot**<sup>3</sup>, **Yann Tison**<sup>4</sup>, **Hervé Martinez**<sup>4,5</sup>, **Bruno Chaudret**<sup>1</sup>, **Céline Nayral**<sup>1,\*</sup> and **Fabien Delpech**<sup>1,\*</sup>

<sup>1</sup> LPCNO, Université de Toulouse, CNRS, INSA, UPS, 135 Avenue de Rangueil, 31077 Toulouse, France; mcvey.bfp@gmail.com (B.F.P.M.); ras2250@columbia.edu (R.A.S.); delphine.lagarde@insa-toulouse.fr (D.L.); solowilly@yahoo.fr (W.-S.O.); bakkouch@insa-toulouse.fr (K.B.); chaudret@insa-toulouse.fr (B.C.)

<sup>2</sup> Euromed Research Center, Engineering Division, Euro-Med University of Fez (UEMF), Route de Meknes, Rond-point de Bensouda, Fès 30070, Morocco

<sup>3</sup> CEMES CNRS UPR 8011 and Université de Toulouse, 29 rue Jeanne Marvig, BP 94347, CEDEX 4, 31055 Toulouse, France; cecile.marcelot@cemes.fr (C.M.); benedicte.warot@cemes.fr (B.W.)

<sup>4</sup> Université de Pau et des Pays de l'Adour, E2S UPPA, CNRS UMR 5254, IPREM, 64053 Pau, France; Electrochemical Energy Storage Network (RS2E), CNRS FR3459, 33 Rue Saint Leu, CEDEX, 80039 Amiens, France; yann.tison@univ-pau.fr (Y.T.); herve.martinez@univ-pau.fr (H.M.)

<sup>5</sup> Centrale Casablanca, Centre de Recherche Systèmes Complexes et Interaction, Bouskoura 27182, Morocco

\* Correspondence: cnayral@insa-toulouse.fr (C.N.); fdelpesch@insa-toulouse.fr (F.D.)

Figure S1: Low (left) and high (right) resolution transmission electron microscopy images of  $\text{Cd}_3\text{P}_2$  cores synthesized with hexadecylamine as the surfactant.

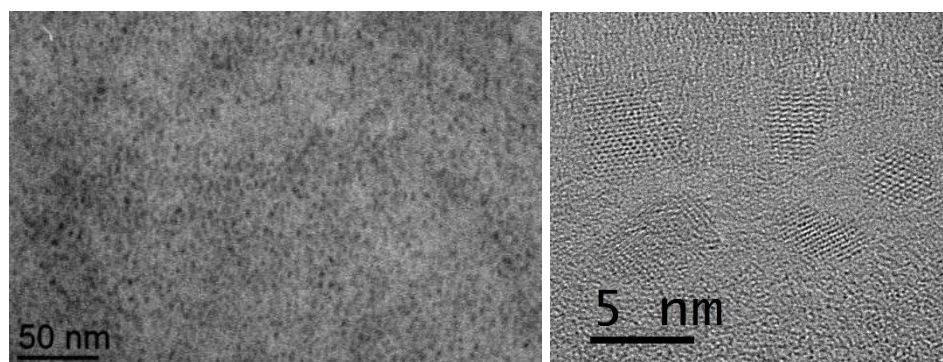

Figure S2: High resolution transmission electron microscopy of  $\text{Cd}_3\text{P}_2/\text{Zn}_3\text{P}_2$  nanocrystals and XRD patterns of  $\text{Cd}_3\text{P}_2$  cores (blue),  $\text{Cd}_3\text{P}_2/\text{Zn}_3\text{P}_2$  (red), the relevant reflections are highlighted for  $\text{Cd}_3\text{P}_2$  00-002-1182 and  $\text{Zn}_3\text{P}_2$  01-002-1264. The \* symbol denotes reflections that are caused by the kapton film.

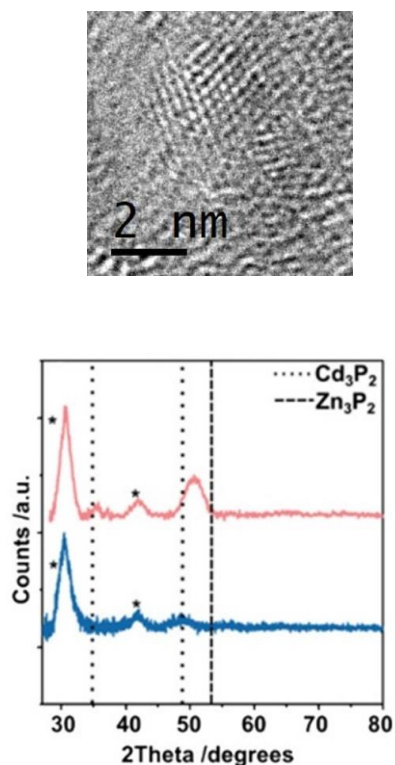

**Table S1: Composition of synthesized nanocrystals from ICP-MS, EDX, and XPS measurements. XPS compositions were determined from the P 2p, Zn 3s and Cd 3d core peaks.**

| Sample                                        | ICP-MS                                                                                                                                                                                                            | EDX                                                                                                                                                                                             | XPS                                                                                                                                                     |
|-----------------------------------------------|-------------------------------------------------------------------------------------------------------------------------------------------------------------------------------------------------------------------|-------------------------------------------------------------------------------------------------------------------------------------------------------------------------------------------------|---------------------------------------------------------------------------------------------------------------------------------------------------------|
| $\text{Cd}_3\text{P}_2$                       | 0.119 mmol Cd; 0.081 mmol P<br><br>( $\text{Cd}_{2,94}\text{P}_2$ )                                                                                                                                               | 64 % Cd; 36 % P<br><br>( $\text{Cd}_{3,55}\text{P}_2$ )                                                                                                                                         | $\text{Cd}_{3,2}\text{P}_2$                                                                                                                             |
| $\text{Cd}_3\text{P}_2/\text{Zn}_3\text{P}_2$ | 0.111 mmol Cd; 0.322 mmol Zn; 0.273 mmol P<br><br>( $\text{Cd}_{0,81}\text{Zn}_{2,36}\text{P}_2$ )<br><br>With a $\text{Cd}_{2,94}\text{P}_2$ core, shell composition is found to be $\text{Zn}_{3,26}\text{P}_2$ | 18 % Cd; 45 % Zn; 37 % P<br><br>( $\text{Cd}_{0,97}\text{Zn}_{2,43}\text{P}_2$ )<br><br>With a $\text{Cd}_{3,55}\text{P}_2$ core, shell composition is found to be $\text{Zn}_{3,35}\text{P}_2$ | $\text{Cd}_{1,1}\text{Zn}_{2,2}\text{P}_2$<br><br>With a $\text{Cd}_{3,2}\text{P}_2$ core, shell composition is found to be $\text{Zn}_{3,3}\text{P}_2$ |

**Table S2: XRD peak maxima and Full Width at Half Maxima for the (220) plan of  $\text{Cd}_3\text{P}_2$  and  $\text{Cd}_3\text{P}_2/\text{Zn}_3\text{P}_2$**

| Sample                                        | Peak maxima (°) | Peak FWHM (°) |
|-----------------------------------------------|-----------------|---------------|
| $\text{Cd}_3\text{P}_2$ cores                 | 48.8°           | 3.88          |
| $\text{Cd}_3\text{P}_2/\text{Zn}_3\text{P}_2$ | 50.7°           | 2.95          |

**Table S3: Time resolved emission measurements: average emission lifetimes of  $\text{Cd}_3\text{P}_2$  and  $\text{Cd}_3\text{P}_2/\text{Zn}_3\text{P}_2$  core-shell nanocrystals.**

| Sample                                        | Coeff A1 | Average lifetime (t <sub>1</sub> ) | Coeff A2 | Average lifetime (t <sub>2</sub> ) |
|-----------------------------------------------|----------|------------------------------------|----------|------------------------------------|
| $\text{Cd}_3\text{P}_2$ cores                 | 0,75     | 110 ns                             | 0,25     | 290 ns                             |
| $\text{Cd}_3\text{P}_2/\text{Zn}_3\text{P}_2$ | 0,25     | 140 ns                             | 0,75     | 290 ns                             |

$$I = A1 \cdot \exp(-t/t_1) + A2 \cdot \exp(-t/t_2) + y_0 \text{ (noise level)}$$

**Figure S3: Magic Angle Spinning NMR of  $\text{Cd}_3\text{P}_2/\text{Zn}_3\text{P}_2$ : 3a)  $^{13}\text{C}$  CP MAS NMR spectra of  $\text{Cd}_3\text{P}_2/\text{Zn}_3\text{P}_2$ , 3b)  $^{31}\text{P}$  Hahn-echo MAS NMR spectra of  $\text{Cd}_3\text{P}_2/\text{Zn}_3\text{P}_2$ .**

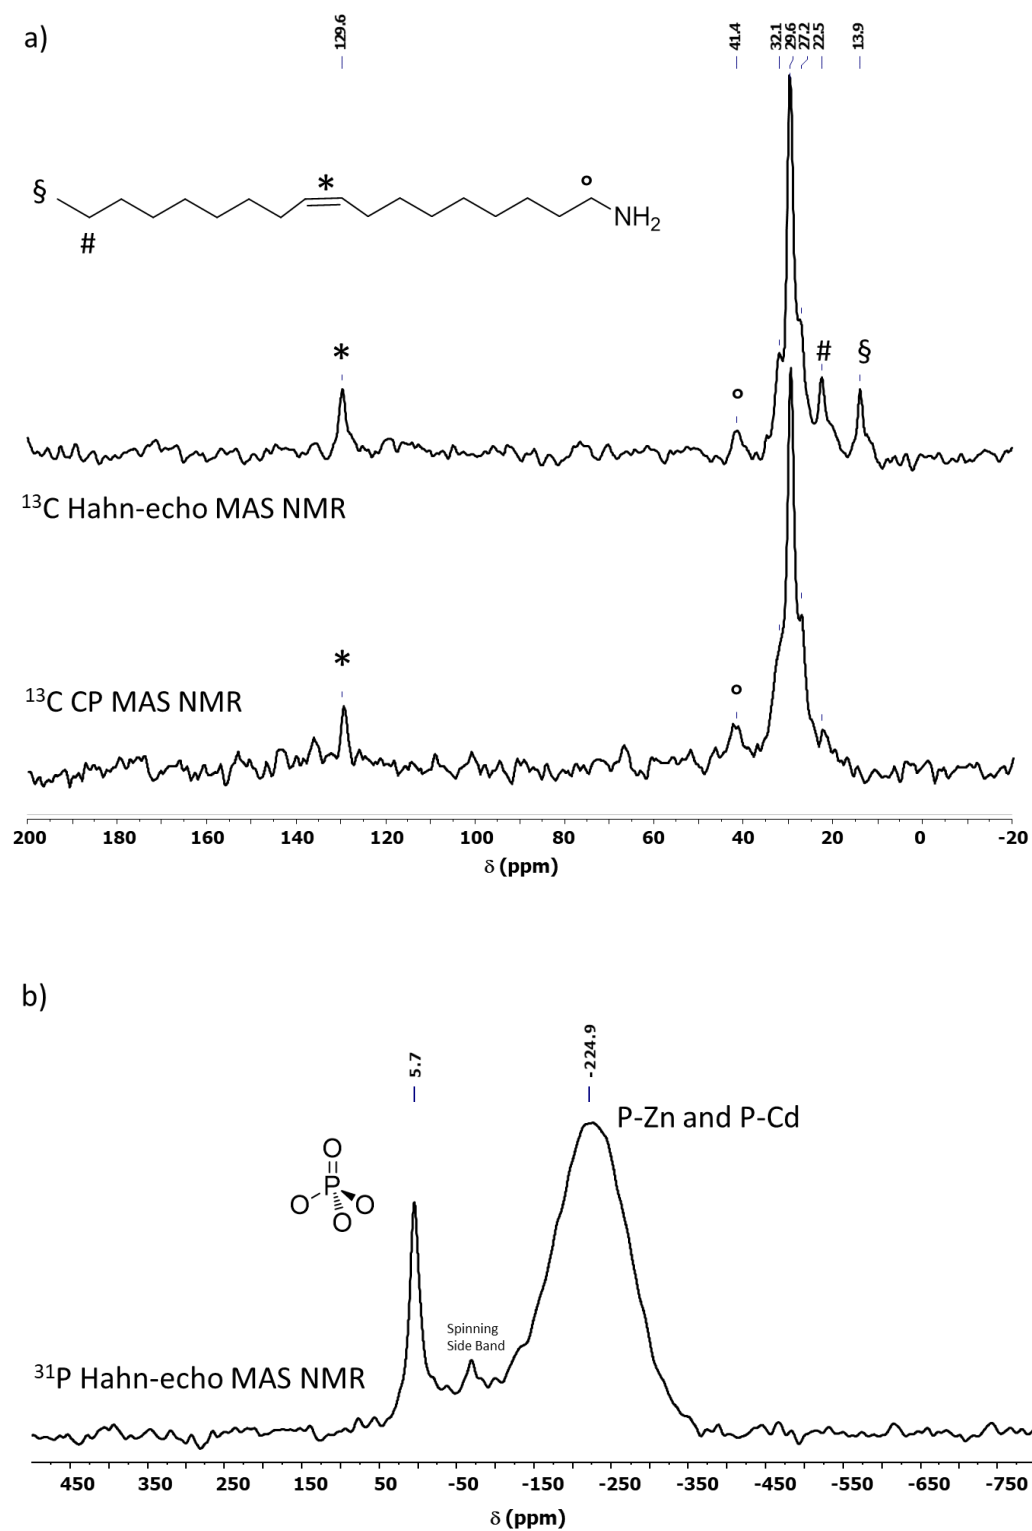

**Figure S4: High resolution XPS of  $\text{Cd}_3\text{P}_2/\text{Zn}_3\text{P}_2$ : a) P 2p and Zn 3s core peaks; b) Cd 3d core peaks, the detection of a N 1s peak at ca. 399.0 eV is due to the presence of Nitrogen atoms in the oleylamine ligands; c) Zn 2p core peaks. The presence of Carbon and Oxygen is also detected through O 1s and C1 core peaks (not shown here).**

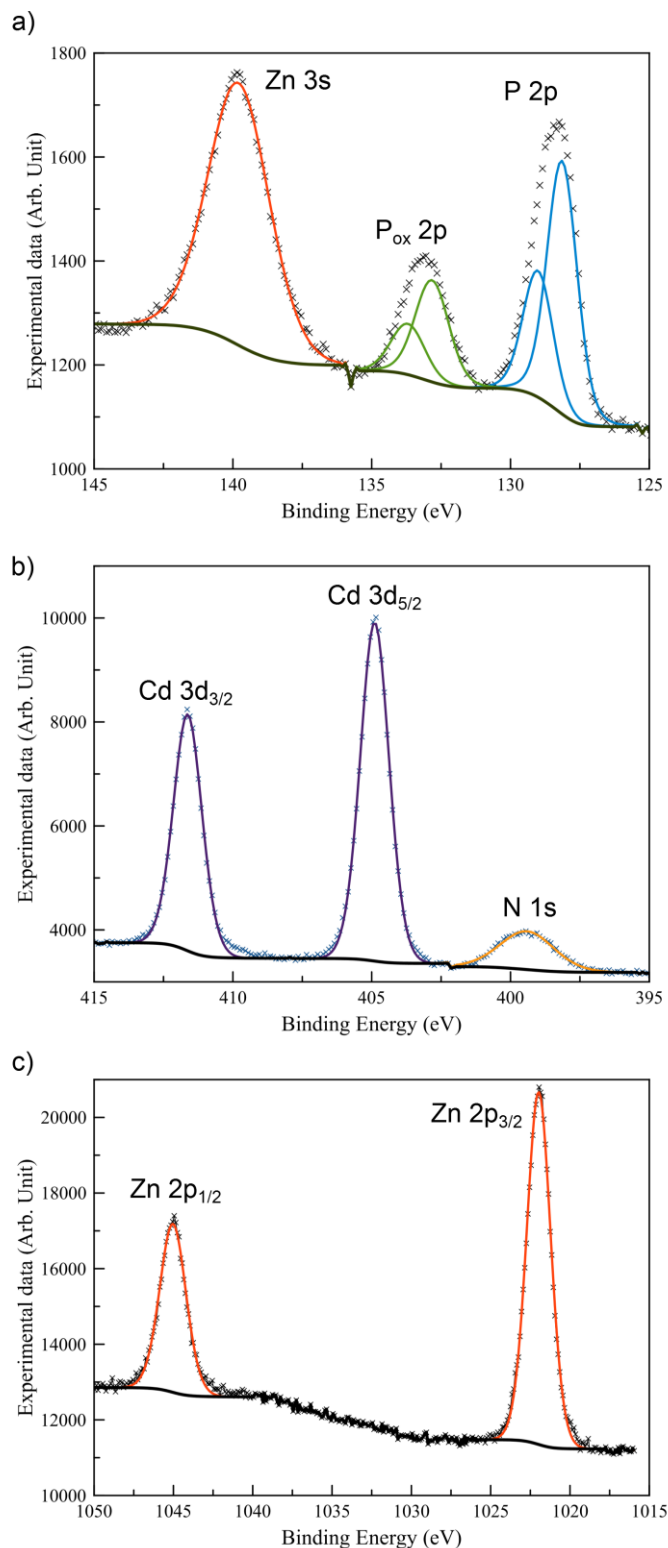

Supplement: s1 [file s1]
